# Supplementary material
Source: PubMed Central journal article supplement (PMC5103011)
Supplement: mmc2.pdf [file mmc2.pdf]

# Basis of Protein Stabilization by K Glutamate: Unfavorable Interactions with Carbon, Oxygen Groups

Xian Cheng,<sup>1</sup> Emily J. Guinn,<sup>3</sup> Evan Buechel,<sup>2</sup> Rachel Wong,<sup>2</sup> Rituparna Sengupta,<sup>1,2</sup> Irina A. Shkel,<sup>2,3</sup> and M. Thomas Record, Jr.<sup>1,2,3,\*</sup>

<sup>1</sup>Program in Biophysics, <sup>2</sup>Department of Biochemistry, and <sup>3</sup>Department of Chemistry, University of Wisconsin-Madison, Madison, Wisconsin

**ABSTRACT** Potassium glutamate (KGlu) is the primary *Escherichia coli* cytoplasmic salt. After sudden osmotic upshift, cytoplasmic KGlu concentration increases, initially because of water efflux and subsequently by  $K^+$  transport and  $Glu^-$  synthesis, allowing water uptake and resumption of growth at high osmolality. In vitro, KGlu ranks with Hofmeister salts KF and  $K_2SO_4$  in driving protein folding and assembly. Replacement of KCl by KGlu stabilizes protein-nucleic acid complexes. To interpret and predict KGlu effects on protein processes, preferential interactions of KGlu with 15 model compounds displaying six protein functional groups— $sp^3$  (aliphatic) C;  $sp^2$  (aromatic, amide, carboxylate) C; amide and anionic (carboxylate) O; and amide and cationic N—were determined by osmometry or solubility assays. Analysis of these data yields interaction potentials ( $\alpha$ -values) quantifying non-Coulombic chemical interactions of KGlu with unit area of these six groups. Interactions of KGlu with the 15 model compounds predicted from these six  $\alpha$ -values agree well with experimental data. KGlu interactions with all carbon groups and with anionic (carboxylate) and amide oxygen are unfavorable, while KGlu interactions with cationic and amide nitrogen are favorable. These  $\alpha$ -values, together with surface area information, provide quantitative predictions of why KGlu is an effective *E. coli* cytoplasmic osmolyte (because of the dominant effect of unfavorable interactions of KGlu with anionic and amide oxygens and hydrocarbon groups on the water-accessible surface of cytoplasmic biopolymers) and why KGlu is a strong stabilizer of folded proteins (because of the dominant effect of unfavorable interactions of KGlu with hydrocarbon groups and amide oxygens exposed in unfolding).

## INTRODUCTION

Potassium glutamate (KGlu) is the primary low-molecular-weight cytoplasmic salt in *Escherichia coli* (1–7). The cytoplasmic concentration of  $K^+$  greatly exceeds that of  $Glu^-$  and other metabolic anions because of the high concentration of nucleic acid phosphates (5–8). Cytoplasmic concentrations of  $K^+$  and  $Glu^-$  are highly variable depending on osmotic conditions of growth. Cytoplasmic  $K^+$  and  $Glu^-$  concentrations increase after an osmotic upshift, initially because of efflux of cytoplasmic water and subsequently by osmoregulated transport of  $K^+$  and synthesis of

anionic glutamate ( $Glu^-$ ) together with the disaccharide trehalose in the active response to this stress (1–15). Accumulation of these solutes allows water influx and resumption of growth in a minimal (glucose) medium. If solutes like proline or glycine betaine are provided (16–18), they are preferentially accumulated in the response to osmotic stress, resulting in uptake of more water for the same mole amount of accumulated solute species, a more dilute cytoplasm, and more rapid cell growth (2,5,7). In vitro, the thermodynamics and kinetics of folding, assembly, and function of proteins and nucleic acids vary strongly with the concentrations of these osmolytes. KGlu, like other *E. coli* osmolytes, stabilizes folded proteins (19,20). Replacement of KCl by KGlu greatly stabilizes protein-nucleic acid complexes, especially at high salt concentration (21–27).

To obtain the information needed to predict or interpret in vivo and in vitro effects of *E. coli* osmolytes, previous research used osmometry to quantify interactions of proline, glycine betaine (GB), and trehalose with model compounds

Submitted June 23, 2016, and accepted for publication August 1, 2016.

\*Correspondence: [mtrecord@wisc.edu](mailto:mtrecord@wisc.edu)

Emily J. Guinn's present address is Institute for Quantitative Biosciences, UC-Berkeley, Berkeley, California.

Evan Buechel's present address is Department of Genetics, Northwestern University, Evanston, Illinois.

Rachel Wong's present address is Department of Immunology, Washington University Medical School, St. Louis, Missouri.

Editor: Timothy Lohman.

<http://dx.doi.org/10.1016/j.bpj.2016.08.050>

© 2016 Biophysical Society.

displaying the hydrocarbon and amide functional groups that are exposed in protein unfolding and with the anionic and cationic groups found on the surface of biopolymers (28–30). Solutes that interact favorably with the biopolymer surface buried in protein folding or formation of biopolymer complexes promote the exposure of this surface and are destabilizers; solutes that interact unfavorably with this biopolymer surface are stabilizers (31). Interactions of proline and GB with aliphatic hydrocarbon ( $sp^3$  C) and with amide and anionic (carboxylate, phosphate) O groups are found to be unfavorable, while interactions with aromatic ( $sp^2$ ) C and with cationic and amide N are favorable. Because the surface exposed in protein unfolding and the water-accessible surfaces of folded proteins and helical nucleic acids are predominantly aliphatic hydrocarbon and amide or anionic oxygen, and interactions of these groups with these solutes are predominantly unfavorable, this quantitatively explains why they are protein stabilizers and effective in vivo osmolytes (28,29). In another approach, interactions of these osmolytes with amino acids were examined by solubility assays and interpreted in terms of interactions with the different side chains and with the peptide backbone (32). Interactions of KGlu with the functional groups of proteins have not previously been investigated.

Robinson and Von Hippel pioneered the quantitative determination of interactions of salts from the Hofmeister series, with model compounds displaying hydrocarbon and amide groups, using solubility (33,34) and chromatography (35,36) assays. We previously analyzed literature data quantifying the interactions of KCl, KF, and  $K_2SO_4$  and other inorganic Hofmeister salts (component 3) with model compounds (component 2) displaying these groups (37). Chemical potential derivatives ( $d$ ) that quantify the effect of one solute component on the chemical potential of the other ( $d\mu_2/dm_3 = \mu_{23} = \mu_{32} = d\mu_3/dm_2$ ) were obtained and interpreted to determine strengths of the unfavorable or favorable interactions of these salts with a unit area of amide and hydrocarbon (C) groups. These results quantified the previous conclusion that interactions of inorganic salts with hydrocarbon groups follow the Hofmeister series of salt effects on protein processes, while interactions of these salts with amide groups do not. For example, KF is a stronger protein stabilizer than KCl because the KF-hydrocarbon interaction is significantly more unfavorable than the KCl-hydrocarbon interaction; interactions of both salts with amide (polar) groups are similarly favorable.

We used this quantitative information to interpret experimental results for the non-Coulombic effects of Hofmeister salts on protein folding and DNA helix formation (31,38). The same order of Hofmeister salt effects is observed for both assembly processes, but the null point differs greatly. While many salts are protein stabilizers, no salt investigated is a nucleic acid stabilizer at high salt concentration where non-Coulombic effects are dominant. This key difference

is readily explained in terms of 1) the different ratios of hydrocarbon ( $h$ ) to polar ( $p$ ) surface exposed in unfolding or melting ( $h/p = 2:1$  for protein unfolding;  $h/p = 1:2$  for DNA duplex melting); and 2) the opposite signs of interactions of inorganic salts with these groups (unfavorable with  $h$ , favorable with  $p$ ). Semiquantitative to quantitative agreement with the experimental data was obtained (31,38).

Here we determine preferential interactions of KGlu with a set of 15 model compounds and interpret these data to quantify interactions of KGlu with six of the seven major functional groups of proteins ( $sp^3$  (aliphatic) C and  $sp^2$  (aromatic ring, amide, carboxylate) C; amide and anionic (carboxylate) O; and amide and cationic N groups) and place KGlu in the series of Hofmeister salts. Comparison of these results with those obtained previously for interactions of inorganic salts with hydrocarbon and amide groups reveals why KGlu is a stronger protein stabilizer than any 1:1 inorganic  $K^+$  salt investigated to date, with a different balance of functional group interactions than those other salts (20). Using these data, quantitative predictions or interpretations of interactions of KGlu with native proteins and effects of KGlu on protein processes can be made in terms of information about the amount and composition of the surface area exposed or buried in these processes. Initial applications include the interpretation of experimental data quantifying the very large unfavorable interactions of KGlu and NaGlu with native proteins and the large stabilizing effect of KGlu on ribosomal protein domain NTL9.

## MATERIALS AND METHODS

### Chemicals

Potassium glutamate monohydrate (>99%) was obtained from Fluka (Sigma-Aldrich, St. Louis, MO). Methylurea, 1,1-diethylurea, malonamide (all >97% pure), and 1,3-dimethylurea, (>99%) were obtained from Sigma-Aldrich. 1,3-Diethylurea (>98%) was from TCI America (Portland, OR). Propionamide (>98%) was from Alfa Aesar (Haverhill, MA). Acetyl-Ala-methylamide (aama, >99%) was from Bachem (Bubendorf, Switzerland). Urea, glycine, GB, and valine (>99%, valine >99.5%) were from Sigma-Aldrich, as were naphthalene and benzene (>98%). Proline (>98.5%) was from SAFC Commercial Life Science Products (part of Sigma-Aldrich). All these chemicals (except KGlu) are anhydrous. All solutes were dissolved in water purified with a Barnstead E-pure system (Thermo Fisher Scientific, Waltham, MA) to no less than 18 M $\Omega$  (DI water).

### Quantifying KGlu-model compound interactions by vapor pressure osmometry

Series of 5–10 three-component solutions were prepared gravimetrically in which the molal concentration of one solute was held constant (at 0.15–0.3 m for KGlu or 0.35–0.95 m for the model compound) and the concentration of the other was varied from zero to 0.6 m for KGlu and to 0.95 m for the model compound. Separate series of 10–13 two-component solutions of KGlu (0.05–0.6 m), model compound (0.05–1 m), and KCl (0.02–1.2 m) were also prepared. The osmolality of each solution was determined in at least triplicate at room temperature ( $23 \pm 1^\circ\text{C}$ ) in a Wescor Model 5600 Vapor Pressure Osmometer (VPO), calibrated with Wescor standards (ELITech, Logan, UT). Bracketing KCl standards were read with each

sample and used to correct its osmolality using literature isopiestic distillation data for KCl (28,29,39,40).

Values of the excess osmolality  $\Delta Osm$  of the KGlu-model compound solution were determined by

$$\Delta Osm = Osm(m_2, m_3) - Osm(m_2, 0) - Osm(m_3, 0), \quad (1)$$

as the difference between the three-component osmolality  $Osm(m_2, m_3)$  and the sum of the corresponding two-component osmolalities  $Osm(m_2, 0) + Osm(0, m_3)$ . Following the usual convention, component 2 is model compound and component 3 is KGlu. For  $\Delta Osm$  calculations on a series of solutions where the concentration of one solute was held constant and the other was varied, the two-component osmolality of the first solute was determined directly while that of the second was determined by interpolation of a quadratic or higher order fit of its two component osmolality as a function of its molality.

Values of the chemical potential derivative  $\mu_{23}$  quantifying KGlu-model compound interactions were obtained from Eq. 2 as previously described in the literature (28,29,39,40):

$$\frac{\mu_{23}}{RT} = \frac{\Delta Osm}{m_2 m_3}. \quad (2)$$

Values of  $\Delta Osm$  were plotted as a function of the molality product  $m_2 m_3$  and  $\mu_{23}$  was determined from the slope of the best-fit straight line with intercept fixed at zero. In Eq. 2, the quantity  $m_2 m_3$  is a measure of the probability of an interaction between the solutes, and  $\mu_{23}/RT$  is a measure of the strength of that interaction.

Measurement of the osmolality of two-component KGlu solutions as a function of KGlu molality  $m_3$  (with  $m_2 = 0$  and KGlu designated by the subscript 3 to be consistent with the notation for three-component solutions) provides analogous information about the self-interaction of KGlu. For KGlu and other 1:1 salts,

$$dOsm/dm_3 = m_3 \mu_{33}/RT = 2(1 + \epsilon_{\pm}), \quad (3a)$$

where  $\mu_{33} = d\mu_3/dm_3$  and the nonideality factor  $\epsilon_{\pm} = d \ln \gamma_{\pm} / d \ln m_3$  where  $\gamma_{\pm}$  is the mean ionic activity coefficient of KGlu. Fig. S1 in the Supporting Material shows the two-component osmolality of KGlu solutions is a quadratic function of KGlu molality  $m_3$  in the full concentration range investigated (0.05–1.3 molal). From the quadratic fit,  $dOsm/dm_3$  increases from  $1.77 \pm 0.01$  at 0.05 m to  $2.06 \pm 0.03$  at 1.3 m with a midrange value of  $1.90 \pm 0.03$  at 0.63 m KGlu, from which  $\epsilon_{\pm} = -0.05 \pm 0.015$ .

For nonelectrolyte solutes like urea, proline, and GB,

$$dOsm/dm_3 = m_3 \mu_{33}/RT = 1 + \epsilon_3, \quad (3b)$$

and the nonideality factor  $\epsilon_3 = d \ln \gamma_3 / d \ln m_3$ , where  $\gamma_3$  is the activity coefficient of the nonelectrolyte.

#### Quantifying KGlu-model compound interactions by solubility assays

Solubility assays at 25°C were used to determine interactions of KGlu with the aromatic hydrocarbon compounds benzene and naphthalene. Two series of 12 KGlu solutions (0–2 m) were prepared gravimetrically and an excess of naphthalene or benzene was added to each KGlu solutions as previously described in Knowles et al. (40). Effects of KGlu on the solubility  $m_2^{ss}$  of the aromatic hydrocarbon (i.e., the molal concentration in the saturated solution) were analyzed to obtain  $\mu_{23}$  using Eq. 3, as previously described in Knowles et al. (40):

$$\mu_{23} \approx -RT \left( \frac{d \ln m_2^{ss}}{dm_3} \right)_{\mu_2}. \quad (4)$$

Values of  $m_2^{ss}$ , the extrapolated molal solubility in the absence of KGlu, were used to normalize the solubility data. For situations where component 2 (the aromatic model compound) is only sparingly soluble and component 3 (here KGlu) is in great excess, as is the case here, Eq. 4 provides an accurate determination of  $\mu_{23}$ .

#### Water-accessible surface area calculations

Water-accessible surface areas (ASA) of the model compounds and native proteins in Table S1, Table S2, and Table S3 were calculated from structures using the SurfRacer program (41) with the Richards set of van der Waals radii (42) and a 1.4 Å probe radius for water. For amino acids, NMR solution structures from BMRB (43,44) were used for these calculations. Because solution structures are not available for the amides and aromatic compounds (benzene, naphthalene) investigated here, their structures were obtained from the NIH CACTUS website, as described in Guinn et al. (39). As a test for systematic differences in ASA between these sources, ASA of amino acids were also calculated using CACTUS structures. Small, nonsystematic ASA differences are observed (see Table S2); these must be considered part of the uncertainty in the parameters ( $\alpha$ -values; Eq. 5 below) obtained from the ASA-based analysis. Contributions to the total ASA were determined for six (for amide and amino acid model compounds in Table S1) or seven (for proteins in Table S3) functional groups:  $sp^3$  C from aliphatic hydrocarbon groups,  $sp^2$  C from aromatic rings, amide C and carboxylate C; amide O, carboxyl O, and hydroxyl O (proteins only); amide N and cationic N. This analysis uses a unified atom model where hydrogens are included as part of the radius of the central atom. Structures of native proteins were obtained from the Protein Data Bank (PDB; <http://www.rcsb.org> (44)). The amount and composition of the  $\Delta ASA$  of unfolding NTL9 was determined previously by analysis of unfolding  $m$ -values for a series of Hofmeister salts together with structural results (20).

## RESULTS

### Quantifying interactions of KGlu with amides and amino acids by VPO

Preferential interactions of KGlu with five amino acids and with eight alkylated ureas and other amides were determined by VPO. Interactions of KGlu with proline, GB, and urea were quantified previously in the literature (28,29,39). These results together with additional data are reported in Fig. 1. These compounds vary widely in amount and type ( $sp^2$ ,  $sp^3$ ) of water-accessible carbon ASA (see Table S1). Urea, alkylated ureas, and other amides studied differ greatly in the amount and ratio of amide N and amide O ASA. While all amino acids have one cationic N and one carboxylate O, the N/O ratio varies widely because GB has a negligibly small cationic N ASA.

Excess osmolalities ( $\Delta Osm$ ) of each KGlu-model compound solution (Eq. 1) are plotted versus the product of molalities of KGlu and model compound ( $m_2 m_3$ ) in Fig. 1. In all cases,  $\Delta Osm$  is proportional to the  $m_2 m_3$  product within the experimental uncertainty, as predicted from Eq. 2 and observed previously for a wide variety of solutes (28,29,39,40). The proportionality constant is  $\mu_{23}/RT$ , from which concentration-independent chemical potential derivatives  $\mu_{23}$  quantifying preferential interactions of KGlu with these solutes are obtained at room temperature ( $23 \pm 1^\circ\text{C}$ ) (see Table 1). Fig. 1 and Table 1 show that interactions of KGlu with all model compounds investigated by VPO except glycine are unfavorable. These results indicate that

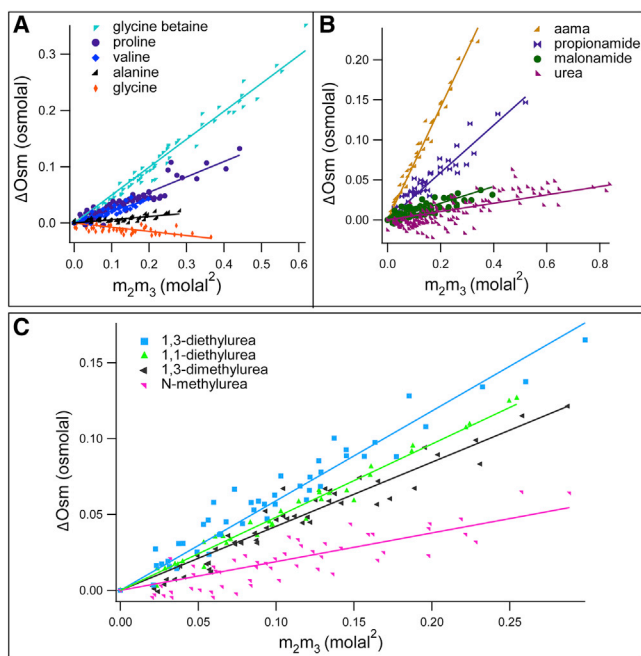

FIGURE 1 Osmometric determinations of chemical potential derivatives  $d\mu_2/dm_3 = \mu_{23}$  quantifying preferential interactions of potassium glutamate (KGlu; component 3) with 13 model compounds displaying protein groups (component 2) at 23°C. Excess osmolalities  $\Delta Osm$  (Eq. 1) are plotted against  $m_2m_3$ , the product of molal concentrations of the model compound and KGlu, and fitted linearly with zero intercept (see Eq. 2) to obtain  $\mu_{23}$  from the slope. (A) Amino acids. (B) Amides (aama). (C) Alkylated ureas. For urea, GB, and proline, new and previously published results (28,29,39) are shown. To see this figure in color, go online.

interactions of KGlu with one or both charged groups of glycine are favorable, while interactions of KGlu with amide and hydrocarbon groups are unfavorable.

### Quantifying interactions of KGlu with aromatic hydrocarbons by solubility assay

Preferential interactions of KGlu with benzene and naphthalene were determined at 25°C from the effect of KGlu on the solubility of these sparingly soluble compounds. The logarithm of the solubility, normalized by the solubility in the absence of KGlu, is plotted as a function of KGlu molality  $m_3$  in Fig. S2. These plots are linear over the KGlu concentration range investigated, with slopes equal to  $\mu_{23}/RT$  from Eq. 4. Positive values of  $\mu_{23}/RT$  for the interactions of KGlu with benzene and naphthalene are obtained, indicating that these KGlu-aromatic interactions are unfavorable and that chemical potentials of the aromatics increase with increasing KGlu molality;  $\mu_{23}$  is significantly larger for the larger aromatic hydrocarbon (naphthalene).

### Trends in KGlu-model compound interactions

Table 1 ranks experimental  $\mu_{23}$ -values for KGlu-model compound interactions from most unfavorable (KGlu-

TABLE 1 Values of  $\mu_{23}$  at 23°C for Interactions of KGlu with Model Compounds

| Model Compound <sup>a</sup> | Hydrocarbon ASA ( $\text{\AA}^2$ ) | Experimental $\mu_{23}$ <sup>b</sup> (cal mol <sup>-1</sup> m <sup>-1</sup> ) | Predicted $\mu_{23}$ <sup>c</sup> (cal mol <sup>-1</sup> m <sup>-1</sup> ) |
|-----------------------------|------------------------------------|-------------------------------------------------------------------------------|----------------------------------------------------------------------------|
| Acetyl-ala-methylamide      | 262                                | 406 ± 6                                                                       | 390 ± 11                                                                   |
| 1,3-Diethylurea             | 255                                | 348 ± 7                                                                       | 350 ± 7                                                                    |
| Naphthalene                 | 275                                | 322 ± 14                                                                      | 342 ± 10                                                                   |
| Glycine betaine             | 197                                | 292 ± 4                                                                       | 294 ± 7                                                                    |
| Benzene                     | 212                                | 291 ± 11                                                                      | 265 ± 8                                                                    |
| 1,1-Diethylurea             | 213                                | 284 ± 4                                                                       | 292 ± 8                                                                    |
| 1,3-Dimethylurea            | 183                                | 249 ± 5                                                                       | 248 ± 6                                                                    |
| Propionamide                | 129                                | 174 ± 6                                                                       | 176 ± 7                                                                    |
| Proline                     | 151                                | 161 ± 4                                                                       | 160 ± 7                                                                    |
| Valine                      | 148                                | 117 ± 5                                                                       | 109 ± 8                                                                    |
| Methylurea                  | 95                                 | 111 ± 6                                                                       | 121 ± 8                                                                    |
| Malonamide                  | 57                                 | 48 ± 2                                                                        | 77 ± 13                                                                    |
| Alanine                     | 91                                 | 29 ± 2                                                                        | 24 ± 8                                                                     |
| Urea                        | 7                                  | 31 ± 2                                                                        | -6 ± 11                                                                    |
| Glycine                     | 56                                 | -50 ± 4                                                                       | -38 ± 8                                                                    |

<sup>a</sup>Ranked from most unfavorable to most favorable experimental  $\mu_{23}$ -value.

<sup>b</sup>Experimental  $\mu_{23}$ -values were obtained from VPO assays at 23°C (Fig. 1), except for benzene and naphthalene, determined from solubility assays at 25°C (Fig. S2; see Materials and Methods). Error estimates are the largest of 8% or the standard deviation determined from the linear fit of the data from Figs. 1 and S2 by Igor Pro.

<sup>c</sup>Predicted  $\mu_{23}$ -values were calculated using  $\alpha_i$ -values of Table 2 and ASA information in Table S1 using Eq. 4. Propagated uncertainties of  $\mu_{23}$ -values are determined using errors of  $\alpha_i$  described in Table 2.

aama) to least unfavorable (KGlu-alanine) and marginally favorable interactions (KGlu-glycine). Also listed are the ASA of hydrocarbon groups on each model compound from Table S1. Interactions of KGlu with all compounds investigated except glycine are unfavorable, with positive  $\Delta Osm$  and  $\mu_{23}$ -values. Qualitative comparison of  $\mu_{23}$ - and hydrocarbon ASA values reveals that the model compounds that interact most unfavorably with KGlu are ones like aama, 1,3-diethylurea, and naphthalene, which have the largest amounts of hydrocarbon ASA. Values of  $\mu_{23}$  are less unfavorable for model compounds with smaller amounts of hydrocarbon ASA. Glycine and urea compounds with small amounts of hydrocarbon ASA exhibit  $\mu_{23}$ -values that are small in magnitude.

The correlation of  $\mu_{23}$  with hydrocarbon ASA indicates that interactions of KGlu with both  $sp^3$  C and  $sp^2$  C are unfavorable. In addition, it indicates that interactions of KGlu with the pairs of polar (amide N and O) or charged (cationic N and carboxylate O) groups on these compounds are either not very significant or make compensating contributions to  $\mu_{23}$  so the hydrocarbon contribution is dominant. Analysis of these  $\mu_{23}$ -values shows that compensations between favorable interactions of KGlu with N (cationic, amide) and unfavorable interactions of KGlu with O (anionic, amide) are involved.

Qualitative indications of these trends are observable in comparisons of KGlu interactions with valine and proline, and with aama and 1,3-diethylurea. The largest

difference in group contributions to the water ASA of the amino acid valine and the amino acid proline (see Table S1) is that valine has 25 Å<sup>2</sup> more cationic N ASA than proline, while ASA of C and O are approximately the same. Table 1 shows that the interaction of KGlu with valine is more favorable than with proline ( $\mu_{23}$  for KGlu-valine is significantly less positive than  $\mu_{23}$  for KGlu-proline). Therefore the interaction of KGlu with cationic N is deduced to be favorable. Because contributions from the interactions of KGlu with cationic and anionic groups on these amino acids appear to compensate in  $\mu_{23}$ , the interaction of KGlu with carboxylate O is deduced to be unfavorable.

Likewise, the largest difference in group contributions to the ASA of aama and 1,3-diethylurea is that aama has 34 Å<sup>2</sup> more amide O ASA than 1,3-diethylurea. (In addition, aama has 13 Å<sup>2</sup> more amide N ASA and 7 Å<sup>2</sup> more hydrocarbon ASA than 1,3-diethylurea.) Table 1 shows that the interaction of KGlu with 1,3-diethylurea is more favorable than with aama ( $\mu_{23}$  for KGlu-1,3-diethylurea is significantly less positive than  $\mu_{23}$  for KGlu-aama). Therefore, the interaction of KGlu with amide O must be unfavorable. Because contributions from the interactions of KGlu with O and N groups on these amides appear to substantially compensate in  $\mu_{23}$ , the interaction of KGlu with amide N is therefore favorable. Quantitative analysis of these  $\mu_{23}$ -values confirms these deductions.

## DISCUSSION

### KGlu-model compound interactions are the sum of KGlu-group interactions

Interactions of a variety of biochemical solutes with model compounds displaying the functional groups of proteins and, in some cases, nucleic acids have been quantified in previous research, using osmometry and solubility assays. Solute investigated include the full series of inorganic Hofmeister salts (31,37,38), the denaturant urea (39,45), the osmolytes GB (28), proline (29), and trehalose (30), as well as glycerol and tetra ethylene glycol (40). Solute-model compound interactions ( $\mu_{23}$ -values) are dissected into solute-functional group interactions using Eq. 5, based on the hypothesis of additivity (tested for each data set) and ASA information for the model compounds:

$$\mu_{23} = \sum_i \alpha_i ASA_i. \quad (5)$$

In Eq. 5, the sum is over all six functional groups present on the model compound ( $1 \leq i \leq 6$ ), where  $ASA_i$  is the water ASA (Table S1) of functional group  $i$  and  $\alpha_i$  is the intrinsic strength of interaction of KGlu with a unit area of that group (Table 2). Best-fit  $\alpha_i$ -values for strengths of interaction of KGlu with  $sp^3$  and  $sp^2$  C, amide and carboxylate O, and amide and cationic N, determined by global fitting to

**TABLE 2** KGlu-Group Interaction Potentials ( $\alpha_i$ ) and Corresponding Local-Bulk KGlu Partition Coefficients ( $K_P$ ) at 23°C

| Surface Type, $i$      | $\alpha_i$ (cal mol <sup>-1</sup> m <sup>-1</sup> Å <sup>-2</sup> ) <sup>a</sup> | SPM $K_P$ <sup>b</sup> |
|------------------------|----------------------------------------------------------------------------------|------------------------|
| Aliphatic ( $sp^3$ ) C | 1.34 ± 0.02                                                                      | 0.63 ± 0.01            |
| $sp^2$ C <sup>c</sup>  | 1.25 ± 0.04                                                                      | 0.65 ± 0.01            |
| Amide O                | 0.76 ± 0.15                                                                      | 0.79 ± 0.02            |
| Carboxylate O          | 0.37 ± 0.07                                                                      | 0.9 ± 0.01             |
| Amide N                | -0.39 ± 0.07                                                                     | 1.11 ± 0.01            |
| Cationic N             | -1.87 ± 0.07                                                                     | 1.52 ± 0.01            |

<sup>a</sup> $\alpha_i$  is defined in Eq. 5. Propagated uncertainties of  $\alpha_i$ -values are calculated from the ASA matrix and experimental uncertainties matrix (40).

<sup>b</sup> $K_P$  calculated from Eq. 6 using a lower-bound hydration  $b_1 = 0.18 \text{ H}_2\text{O}/\text{Å}^2$  (37) and a midrange value of  $d\text{Osm}/d\text{m}_3 = 2(1 + \epsilon_{\pm}) = 1.90 \pm 0.03$  for KGlu self-interactions (see Materials and Methods and Fig. S1).

<sup>c</sup> $sp^2$  C includes aromatic C, amide C, and carboxylate C (see Table S1).

Eq. 5 of the 15  $\mu_{23}$ -values from Table 1 and the ASA information from Table S1, are summarized in the bar graph of Fig. 2. These confirm the qualitative analysis of trends in the  $\mu_{23}$ -values described above.

A positive  $\alpha$ -value indicates an unfavorable interaction of KGlu with that group while a negative  $\alpha$ -value indicates a favorable interaction. Fig. 2 shows that interactions of KGlu with  $sp^3$  C,  $sp^2$  C, and with amide and carboxylate O are unfavorable (in this order), while interactions of KGlu with amide and cationic N are favorable. The unfavorable  $\alpha$ -value for interaction of KGlu with amide O is twice as large in magnitude and opposite in sign to the favorable  $\alpha$ -value for interaction of KGlu with amide N.

Fig. 3 compares experimentally observed  $\mu_{23}$ -values for interactions of KGlu with these 15 model compounds with those predicted from Eq. 4 and the best-fit  $\alpha_i$ -values from Table 2. A numerical comparison is provided in Table 1. For most of the data set, predicted and observed  $\mu_{23}$ -values agree within the combined uncertainties of these values. Exceptions are urea and malonamide. The disagreement for urea is surprising because  $\alpha_i$ -values quantifying the

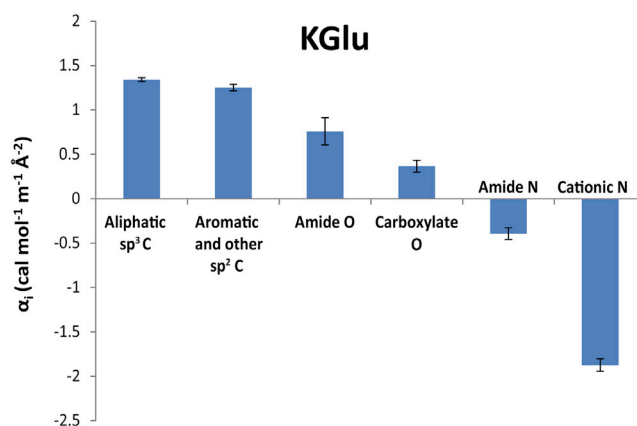

**FIGURE 2** Interaction potentials ( $\alpha$ -values) quantifying interactions of KGlu with a unit area of each functional group of model compound at 23–25°C. Unfavorable interactions have positive  $\alpha$ -values. To see this figure in color, go online.

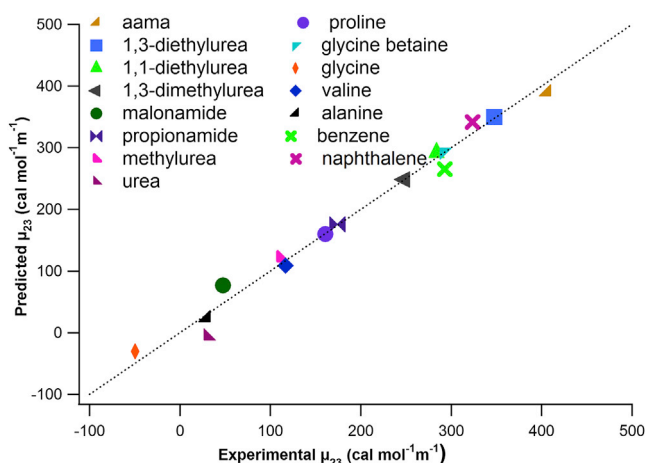

FIGURE 3 Predicted versus experimental (observed) values of  $\mu_{23}$  for interactions of KGlu with model compounds at 23°C (see Table 1). (Line) Equality of predicted and observed values. To see this figure in color, go online.

interactions of urea with the functional groups of  $\text{Glu}^-$  and with  $\text{K}^+$  successfully predict the urea (solute)—KGlu (model compound) interactions ( $\mu_{23} = \mu_{32}$ : the predicted  $\mu_{23}$ -value for the urea-KGlu interaction from those urea  $\alpha_i$ -values is  $45 \pm 18 \text{ cal mol}^{-1} \text{ m}^{-1}$  (39)). Interactions of KGlu with other amides and with amino acids and derivatives in Table 1 are well predicted from these  $\alpha_i$ -values, validating the assumption of additivity (Eq. 5).

The ASA of backbone amide groups of proteins is ~70% amide O, 25% amide N, and 5% amide C, while side-chain amide ASA is ~35% amide O, 60% amide N, and 5% amide C. From Table 1, the composite  $\alpha_i$ -value for the interaction of KGlu with backbone amide groups is predicted to be moderately unfavorable ( $0.50 \text{ cal mol}^{-1} \text{ m}^{-1} \text{ \AA}^{-2}$ ) while the interaction of KGlu with side-chain amide groups is predicted to be only slightly unfavorable ( $0.11 \text{ cal mol}^{-1} \text{ m}^{-1} \text{ \AA}^{-2}$ ). The number of backbone amide groups greatly outnumbers the number of side-chain amide groups in most proteins, so the overall interaction of KGlu with amide ASA of proteins is predicted to be moderately unfavorable. Interactions of KGlu with all C groups (both  $\text{sp}^3 \text{ C}$  and  $\text{sp}^2 \text{ C}$ ) are very unfavorable, with  $\alpha$ -values that exceed those for KGlu-amide O and KGlu-carboxylate O interactions. Because typically >85% of the ASA exposed in unfolding a globular protein is hydrocarbon and amide, the unfavorable interactions of KGlu with these groups explain why KGlu stabilizes folded proteins. Quantitative interpretation of the KGlu  $m$ -value for unfolding NTL9 confirms this conclusion (20).

### Interpretation of KGlu $\alpha$ -values as net effects of local accumulation or exclusion of $\text{K}^+$ and $\text{Glu}^-$ ions

Because KGlu is a strong electrolyte, completely dissociated into ions in solution, these component  $\mu_{23}$ -values and

$\alpha$ -values must be interpreted as the net thermodynamic effect of the interaction of  $\text{K}^+$  and  $\text{Glu}^-$  ions with the compound or functional group (31,37). This interpretation is most readily made at the level of ion partition coefficients  $K_p$  that quantify the accumulation or exclusion of  $\text{K}^+$  and  $\text{Glu}^-$  in the vicinity of each compound or group.

KGlu  $\alpha$ -values are interpreted in terms of the local distributions of  $\text{K}^+$  and  $\text{Glu}^-$  ions in the vicinity of protein functional groups using a molecular thermodynamic analysis of the solute partitioning model (SPM) (31,37,46–49). Negative (positive)  $\alpha$ -values, indicating net favorable (unfavorable) KGlu-group interactions, correspond to net accumulation (exclusion) of  $\text{K}^+$  and  $\text{Glu}^-$  ions in the vicinity of the group, relative to the bulk KGlu concentration. The SPM approximates the continuous radial distribution of an uncharged solute or salt ion in the vicinity of a surface or group by an average local concentration ( $m_{3,\text{local}}$ ) that in general differs from the bulk solute concentration ( $m_{3,\text{bulk}}$ ). Interpreted using the SPM, the experimental finding that  $\mu_{23}$ -values and  $\alpha$ -values are independent of  $m_{3,\text{bulk}}$  means that  $m_{3,\text{local}}$  is proportional to  $m_{3,\text{bulk}}$ . The proportionality constant in this relationship is a concentration-independent local-bulk partition coefficient  $K_p$  ( $K_p = m_{3,\text{local}}/m_{3,\text{bulk}}$ ), which is the microscopic analog of a partition coefficient or observed equilibrium constant for partitioning of a solute between two macroscopic phases.

For a salt like KGlu with  $\nu$ -ions per formula unit ( $\nu = \nu_+ + \nu_-$ ), each KGlu-group interaction potential  $\alpha_i$  is related to the corresponding local-bulk partition coefficient  $K_{p,i}$  of the electro-neutral salt by the SPM result (Eq. 6):

$$\alpha_i = RT \frac{-\nu(K_{p,i} - 1)b_{1,i}(1 + \epsilon_{\pm})}{55.5}, \quad (6)$$

where  $b_{1,i}$  is the surface density of water in the hydration layer of functional group  $i$ . Lower bounds on  $b_{1,i}$  for different groups are  $\sim 0.18 \text{ H}_2\text{O}/\text{\AA}^2$  or two layers of local water of hydration, obtained from studies with highly excluded solutes (28,31,37). The term  $\epsilon_{\pm} = d \ln \gamma_{\pm} / d \ln m_3$  in Eq. 6 accounts for KGlu self-interaction (see Eq. 3 a).

For a 1:1 salt like KGlu, these salt  $K_p$  values are interpreted as the arithmetic averages of the  $K_p$  values for the cation and anion (37):

$$K_p = (K_{p,+} + K_{p,-})/2. \quad (7)$$

The SPM derivation predicts that individual ion contributions should be quantified by single-ion  $K_p$  values and not by defining single ion  $\alpha$ -values (31,48,49).

For the electroneutral KGlu component,  $K_p$  values quantifying the net accumulation or exclusion of its ions in the vicinity of the protein functional groups investigated are listed in Table 2. For the intrinsically most unfavorable interactions of KGlu with aliphatic and aromatic hydrocarbon groups, the tabulated  $K_p$  values indicate that the average of

the local concentrations of  $K^+$  and  $Glu^-$  ions near hydrocarbon groups is only two-thirds of the overall (bulk) KGLu concentration (local exclusion). At the other extreme of the most favorable interaction of KGLu with cationic N, the tabulated  $K_p$  value indicates that the average of the local concentrations of  $K^+$  and  $Glu^-$  ions near cationic N group is ~50% larger than the overall (bulk) KGLu concentration (local accumulation). Table 2 also shows that the ions of KGLu are more excluded from amide O than from carboxylate O, and less accumulated at amide N than at cationic N.

Even in the relatively high salt, non-Coulombic regime investigated here,  $K^+$  is expected to interact unfavorably with (i.e., be locally excluded from;  $K_{p,+} < 1$ ) hydrocarbon C and amide N, and to interact favorably with (i.e., be locally accumulated near;  $K_{p,+} > 1$ ) amide O. Likewise  $K^+$  is expected to interact favorably with carboxylate O but unfavorably with cationic N. Based on these expectations, interactions of  $Glu^-$  with cationic and amide N must be quite favorable ( $K_{p,-} \gg 1$ ) and interactions of  $Glu^-$  with anionic and amide O must be quite unfavorable ( $K_{p,-} \ll 1$ ) to yield the observed KGLu component  $\alpha$ -values in Table 2. Experiments are in progress to determine single-ion  $K_p$  values and test these predictions, as well as to further dissect interactions of  $Glu^-$  with protein functional groups into interactions of individual groups on  $Glu^-$  with those protein groups.

### Prediction and interpretation of the massive unfavorable interactions of glutamate salts with folded proteins: relevance for the effectiveness of KGLu as an *E. coli* osmolyte

Arakawa and Timasheff (19) determined preferential interactions ( $\mu_{23}$ ) of NaGLu with tubulin, bovine serum albumin

(BSA),  $\beta$ -lactoglobulin, and lysozyme by dialysis and densimetry (20°C, pH 7 Table 3). Courtenay et al. (50) determined the preferential interaction of KGLu with BSA by VPO (24–25°C, near neutral pH). Interactions of KGLu and NaGLu with these proteins, ranging in size from 14.3 kDa (lysozyme) to 96.7 kDa (tubulin dimer) and from negatively to positively charged at pH 7, are highly unfavorable. A 1 molal increase in NaGLu concentration increases the chemical potential of lysozyme by ~6 kcal/mol and increases the chemical potential of tubulin dimer by 28 kcal/mol. To a first approximation, values of  $\mu_{23}$  for these glutamate salt-protein interactions increase in proportion to the water accessible surface area, as well as to molecular weight and molecular volume of the protein. For example, Table 3 shows that experimental values of  $\mu_{23}/ASA$  are in the range 0.8–1.3 cal mol<sup>-1</sup> molal<sup>-1</sup> Å<sup>-2</sup>.

Are these massive effects of KGLu or NaGLu on protein chemical potentials predominantly excluded volume (physical) effects, or do they arise from unfavorable chemical interactions of KGLu or NaGLu with functional groups on the protein surface? To answer this question, we predict the chemical interactions of KGLu with the functional groups on the surface of these proteins using the composition of the ASA (Table S3) and the  $\alpha$ -values from Table 2 using Eq. 5. These predictions of  $\mu_{23}$ , listed in Table 3, agree with experimental values within the combined uncertainty for three of the five cases (KGLu-BSA, NaGLu-tubulin, NaGLu-lysozyme), and are ~50% too small for the other two cases (NaGLu-BSA, NaGLu- $\beta$ -lactoglobulin). The two discrepancies may not be a failure of the predictions; Table 3 indicates that the predicted values of  $\mu_{23}/ASA$  for NaGLu-BSA and NaGLu- $\beta$ -lactoglobulin interactions, not the experimental  $\mu_{23}/ASA$ , are consistent with predicted and experimental values of

**TABLE 3 Comparison of Observed and Predicted Interactions of KGLu or NaGLu with Globular Proteins and KGLu  $m$ -values for NTL9 Unfolding**

| Protein <sup>a</sup> (Preferential Interaction) | Salt (Concentration) | $\mu_{23}$ (kcal mol <sup>-1</sup> m <sup>-1</sup> )                    |                        | $\mu_{23}/ASA$ (cal mol <sup>-1</sup> m <sup>-1</sup> Å <sup>-2</sup> ) <sup>b</sup>                            |                        |
|-------------------------------------------------|----------------------|-------------------------------------------------------------------------|------------------------|-----------------------------------------------------------------------------------------------------------------|------------------------|
|                                                 |                      | Observed                                                                | Predicted <sup>c</sup> | Observed                                                                                                        | Predicted <sup>c</sup> |
| Tubulin                                         | NaGLu(1 M)           | 27.6 ± 3.7 <sup>d</sup>                                                 | 18.6 ± 4               | 0.9 ± 0.1                                                                                                       | 0.6 ± 0.1              |
| BSA                                             | KGLu (0–1 molal)     | 22.4 ± 2.2 <sup>e</sup>                                                 | 18 ± 2.7               | 0.8 ± 0.1                                                                                                       | 0.6 ± 0.1              |
|                                                 | NaGLu (1 M)          | 35.9 ± 2.3 <sup>d</sup>                                                 | 18 ± 2.7               | 1.3 ± 0.1                                                                                                       | 0.6 ± 0.1              |
| $\beta$ -lactoglobulin                          | NaGLu (1 M)          | 18.9 ± 0.6 <sup>d</sup>                                                 | 9.3 ± 1.8              | 1.2 ± 0.1                                                                                                       | 0.6 ± 0.1              |
| Lysozyme                                        | NaGLu (1 M)          | 5.7 ± 2.5 <sup>d</sup>                                                  | 2.7 ± 1.2              | 0.9 ± 0.4                                                                                                       | 0.4 ± 0.2              |
| Protein unfolding                               | salt (concentration) | $m$ -value = $\Delta\mu_{23}$ (kcal mol <sup>-1</sup> m <sup>-1</sup> ) |                        | $m$ -value/ $\Delta ASA$ = $\Delta\mu_{23}/\Delta ASA$ (cal mol <sup>-1</sup> m <sup>-1</sup> Å <sup>-2</sup> ) |                        |
|                                                 |                      | Observed                                                                | Predicted              | Observed                                                                                                        | Predicted              |
| NTL9 <sup>f</sup>                               | KGLu (0–1.5 M)       | 1.9 ± 0.2                                                               | 1.4 ± 0.3              | 1.1 ± 0.1                                                                                                       | 0.8 ± 0.1              |

<sup>a</sup>Tubulin and  $\beta$ -lactoglobulin are dimers; BSA and lysozyme are monomers.

<sup>b</sup>PDB files used for ASA calculations (see Table S3) are PDB: 1TUB for tubulin (59); PDB: 4F5S for BSA (60); PDB: 4TLJ for  $\beta$ -lactoglobulin (61); and PDB: 6LYZ for lysozyme (62).

<sup>c</sup>Predicted  $\mu_{23}$ -values are calculated from Eq. 5 using  $\alpha_i$ -values from Table 1 and ASA information from Table S3.

<sup>d</sup>Values of  $\mu_{23}$  for interactions of NaGLu with native proteins at 20°C are calculated from the Donnan coefficient  $\Gamma_{23} \approx -\mu_{23}/\mu_{33}$  (obtained by dialysis/densimetry (19)) using  $\mu_{33}^{KGLu} = 1.90 RT/m_3$  determined for KGLu in Fig. S1.

<sup>e</sup>Value of  $\mu_{23}$  for interaction of KGLu with BSA is calculated from  $\Gamma_{23}$  determined by VPO at 24–25°C (29) using  $\mu_{33}^{KGLu} = 1.90 RT/m_3$ .

<sup>f</sup>Experimental NTL9  $m$ -value is from Sengupta et al. (20), with an estimated experimental uncertainty of ±10%. Predicted NTL9  $m$ -value and uncertainty are calculated from Eq. 8 using the six  $\alpha_i$ -values from Table 1 and estimates of the corresponding  $\Delta ASA_i$  for unfolding NTL9 to the best-fit (compact) model of the denatured state ensemble at 20°C (20).

$\mu_{23}$  /ASA for KGlu-BSA, NaGlu-tubulin, and NaGlu-lysozyme.

These predictions do not take account of the interaction of KGlu with hydroxyl O because this  $\alpha$ -value has not been determined. This interaction is expected to be unfavorable and much smaller in magnitude than  $\alpha$ -values for interactions of KGlu with amide and carboxylate O. Because hydroxyl O ASA is only a small fraction of the total ASA or  $\Delta$ ASA of the proteins and process considered, we expect its contribution will be negligible. We assume that contributions of  $\text{Na}^+$  and  $\text{K}^+$  to these  $\alpha$ -values are similar, as has been seen in previous comparisons (37,38). Finally, we neglect the contribution to the predicted  $\mu_{23}$  from what is expected to be a modest favorable interaction of KGlu or NaGlu with the inorganic counterions ( $\text{Na}^+$  or  $\text{Cl}^-$ ) of the electroneutral protein component. For other solutes, these interactions can be unfavorable and make a more significant contribution, as for the interaction of PEG with the  $\text{Cl}^-$  counterions of lysozyme (51).

At a molecular level, we conclude that chemical exclusion of KGlu or NaGlu from the water of hydration of hydrocarbon and carboxylate and amide oxygen groups of these proteins is sufficient to explain the origin of the large unfavorable thermodynamic effect (increase in protein chemical potential) upon addition of KGlu or NaGlu, and that physical (excluded volume) effects are not the origin of this effect. Theoretical and experimental results with other solutes provide support for this conclusion. Both scaled particle theory (52,53) and theory of two-component hard-sphere fluid mixtures (54) indicate that excluded volume effects become negligible when the size of the solute becomes comparable to that of the solvent. Preferential interactions of small oligoethylene glycols (ethylene glycol to tetraethylene glycol or PEG200) with proteins and effects of these small oligoethylene glycols on protein and nucleic acid processes are quantitatively interpreted as chemical interactions using model compound data. Only for larger PEGs do physical excluded volume effects contribute (40,51). While PEG200 and the hydrated ions of KGlu are larger than a single water molecule, these solutes are comparable in size to that of a hydrogen-bonded cluster of water molecules in liquid water.

In solutions of proteins and glutamate salts, key functional groups on these proteins and on the glutamate salts prefer to interact with water than with each other, resulting in net chemical exclusion of the ions of KGlu and NaGlu from the water of hydration of the protein and a smaller average local ion concentration than the bulk salt concentration. This local exclusion causes the chemical potential of a protein to increase linearly with KGlu or NaGlu molal concentration, with slope  $\mu_{23}$ . For the series of proteins investigated,  $\mu_{23}$  increases with increasing protein surface area (ASA), as summarized in Table 3.

## Prediction and interpretation of effects of KGlu on protein folding

The often-large effects of stabilizing and destabilizing solutes and the non-Coulombic effects of Hofmeister salts like KGlu on biopolymer processes are manifested as a linear dependence of the observed standard free energy change ( $\Delta G_{\text{obs}}^{\circ} = -RT \ln K_{\text{obs}}$ ) on solute concentration (20,38). The slope of this plot, typically called the  $m$ -value, is equal to the difference in  $\mu_{23}$ -values between products and reactants ( $\Delta\mu_{23} = d\Delta G_{\text{obs}}^{\circ}/dm_3 = m$ -value). Because the underlying solute-biopolymer interactions are short range,  $\Delta\mu_{23}$  is accurately interpreted as the interactions of the solute with the biopolymer surface that is exposed or buried in the process (i.e., the  $\Delta$ ASA). Because  $\mu_{23} = \sum_i \alpha_i \text{ASA}_i$  (Eq. 5), therefore

$$m\text{-value} = \Delta\mu_{23} = \sum_i \alpha_i \Delta\text{ASA}_i. \quad (8)$$

Addition of KGlu strongly stabilizes ribosomal protein NTL9 (the 56-residue N-terminal domain of ribosomal protein L9) against unfolding, with an observed  $m$ -value of  $1.9 \pm 0.2 \text{ kcal mol}^{-1} \text{ m}^{-1}$  at 20°C. Unfolding of NTL9 exposes primarily hydrocarbon and amide groups; approximately two-thirds of the  $\Delta$ ASA is hydrocarbon and one-quarter is amide, accounting for >90% of the  $\Delta$ ASA. Table 2 shows that KGlu interacts unfavorably with all hydrocarbon groups and with oxygens, but interacts favorably with nitrogens. For the ~1.1: 1 ratio of amide O: amide N ASA exposed in unfolding NTL9 (20), the KGlu-amide interaction is unfavorable, with a net KGlu-amide  $\alpha$ -value =  $0.2 \pm 0.1 \text{ cal mol}^{-1} \text{ m}^{-1} \text{ \AA}^{-2}$  from Table 2. For the ~7.7:1 ratio of aliphatic to aromatic C exposed in unfolding NTL9, the net KGlu-hydrocarbon  $\alpha$ -value is  $1.33 \pm 0.03 \text{ cal mol}^{-1} \text{ m}^{-1} \text{ \AA}^{-2}$  from Table 2.

We (20) used published  $\alpha$ -values for interactions of inorganic Hofmeister salts with hydrocarbon and amide groups to predict  $m$ -values for unfolding NTL9 in destabilizing and stabilizing salts from ASA information using Eq. 8. From a comparison of predicted and observed  $\Delta$ ASA of unfolding, we concluded that substantial structure remains in the unfolded form of NTL9. We predicted that the  $\Delta$ ASA of unfolding ( $1577 \text{ \AA}^2$ ) is only one-third of that predicted for unfolding to a completely unstructured unfolded form ( $4340 \text{ \AA}^2$ ). Using this  $\Delta$ ASA of unfolding NTL9 (see Table S3), we predict an unfolding  $m$ -value of  $1.4 \pm 0.3 \text{ kcal mol}^{-1} \text{ m}^{-1}$  at  $23 \pm 1^\circ\text{C}$ . Predicted and observed  $m$ -values agree at the limits of their combined uncertainties (Table 3). By far the major contribution to the  $m$ -value is predicted to be from exposing hydrocarbon groups ( $m$ -value contribution of  $1.47 \text{ cal mol}^{-1} \text{ m}^{-1}$ ) with minor offsetting contributions from exposing amide groups ( $0.1 \text{ cal mol}^{-1} \text{ m}^{-1}$ ) and charged groups ( $-0.13 \text{ cal mol}^{-1} \text{ m}^{-1}$ ). We are determining interactions of KCl and other Hofmeister salts with amino acids and their derivatives, amides, alkylated ureas, aromatics,



nucleobases, and other model compounds to test the previously determined hydrocarbon and amide  $\alpha$ -values, dissect amide  $\alpha$ -values into O and N interactions, and determine interactions of Hofmeister salts with charged groups. These results will not only improve the analysis of salt effects on protein folding but also will provide the quantitative information needed to interpret the large stabilizing effects of replacing KCl with KGlu on protein-nucleic acid interactions.

### Comparison of interactions of KGlu and other Hofmeister salts with hydrocarbon and amide groups

KGlu interacts unfavorably with carbon ( $sp^3$  (aliphatic) C,  $sp^2$  (aromatic, amide, carboxylate) C) and oxygen (amide O and carboxylate O) groups, and interacts favorably with nitrogen groups (amide N and cationic N). Because the  $\alpha$ -value (Table 2) quantifying the unfavorable interaction of KGlu with unit area of amide O is twice as large in magnitude as that for interaction of KGlu with unit area of amide N, KGlu is predicted to interact very unfavorably with backbone ( $2^\circ$ ) amide groups (large O/N; e.g., 2.8 for aama (Table S1)) and slightly unfavorably with side-chain ( $1^\circ$ ) amide groups (small O/N; e.g., 0.6 for propionamide (Table S1)). This net-unfavorable interaction of KGlu with amide groups differs greatly from the net-favorable interactions of inorganic Hofmeister salts with amide groups (often characterized as salting-in of amides (33,34,37)). For inorganic salts, the classical Hofmeister series ranking for protein processes is determined by the rank order of interactions of these salts with hydrocarbon groups; interactions with amide groups are largely favorable and do not follow the Hofmeister series order. On the basis of its interaction with hydrocarbon groups, KGlu would be ranked between

KCl and KF as a moderate stabilizer, but its net-unfavorable interaction with amide groups significantly increases its effectiveness as a protein stabilizer, so that KGlu ranks between KF and  $K_2SO_4$  and is almost as effective on a per-ion basis as  $K_2SO_4$ . Hence the explanation for the Hofmeister ranking of KGlu is analogous to that previously determined for GuHCl, which on the basis of its interaction with hydrocarbon groups would not be a strong protein destabilizer. GuHCl is a strong destabilizer primarily because of its very favorable interaction with amide groups (37,55).

### Comparison of KGlu $\alpha$ -values and KGlu-protein $\mu_{23}$ -values with those of other *E. coli* osmolytes and urea

When osmotically stressed during growth in a minimal glucose-salt medium, *E. coli* increases cytoplasmic amounts of KGlu and trehalose by transport of  $K^+$  and synthesis of  $Glu^-$  and trehalose to maintain growth up to an external osmolality of  $\sim 1.8$  Osm (1–6,9–14). If proline or GB is present at low concentration in the growth medium, these solutes are accumulated instead of KGlu and trehalose, increasing growth rate and significantly extending the range of external osmolalities of growth (2,7,14). Hence proline and GB are often called osmoprotectants. All these osmolytes increase the stability of globular proteins (19,56). Proline reduces the stability of nucleic acid duplexes and various tertiary structures (57). GB also reduces the stability of nucleic acid duplexes (57,58) but increases the stability of various RNA tertiary structures (57), a result that is explained by the highly unfavorable interaction of GB with RNA phosphate oxygens (28) that are buried in forming these tertiary structures.

Fig. 4 compares  $\alpha$ -values for the interactions of osmolytes/stabilizers KGlu, proline, and GB and the destabilizer

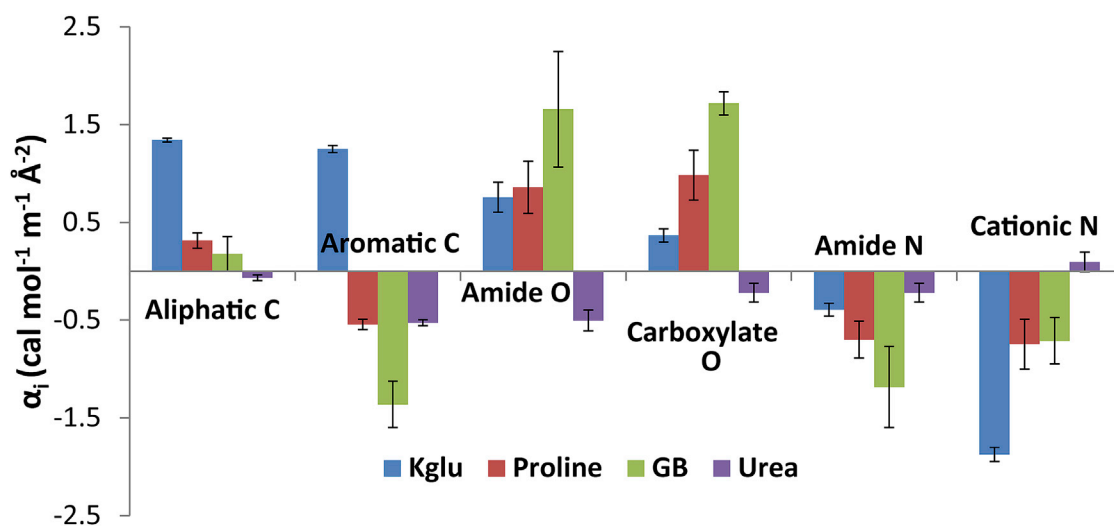

FIGURE 4 Comparison of  $\alpha$ -values for interactions of cytoplasmic osmolytes (KGlu, proline (29), and GB (28)) and urea (39) with protein functional groups at 23°C. To see this figure in color, go online.

urea with protein functional groups. A clear contrast is evident between all three osmolytes/stabilizers and urea. All three osmolytes interact unfavorably with aliphatic C and with amide and anionic (carboxylate) O, while urea interacts favorably with these groups. In the concentrated biopolymer environment of the cytoplasm, unfavorable interactions of KGlu, proline, and GB with anionic (carboxylate, phosphate) O, aliphatic C, and amide O groups on the surface of proteins, nucleic acids, and the cytoplasmic membrane increase the osmolality of the cytoplasm above the ideal value based solely on the molal concentration of these solutes. The unfavorable interactions make these solutes more effective osmolytes in vivo than solutes like urea that would interact favorably with these biopolymer groups and hence reduce cytoplasmic osmolality from its ideal value. Experimental evidence for this from direct measurements of solute-protein and solute-nucleic acid interactions has been presented previously for GB and proline (28,29); additional evidence from analysis of interactions of these solutes and KGlu with BSA is discussed in the next section.

The rank order of effectiveness of these solutes as osmolytes in the cytoplasm of *E. coli* is GB >> proline > KGlu (2,5,7). This order of in vivo effectiveness is the same as the order of interaction of these solutes with the anionic protein BSA (as quantified by  $\mu_{23}$ -values; Table S4). Fig. 4 reveals that the order of in vivo effectiveness is also the same as the order of interaction of these solutes with anionic and amide O (GB most unfavorable; KGlu least unfavorable), but is opposite to their order of interaction with aliphatic and aromatic C (KGlu most unfavorable; GB least unfavorable/most favorable). Interactions of all these osmolytes with cationic and amide N are favorable. Additionally, Fig. S1 and Table S4 reveal that the rank order of in vivo effectiveness is the same as the order of self-interactions of these solutes (see Eq. 3): the GB self-interaction is highly unfavorable (from  $d\text{Osm}/d\text{m}_3$ ,  $m_3\mu_{33}^{\text{ex}}/RT = \epsilon_{3(\text{GB})} = 0.14$ ), the proline self-interaction is modestly unfavorable ( $m_3\mu_{33}^{\text{ex}}/RT = \epsilon_{3(\text{Proline})} = 0.04$ ), while the KGlu self-interaction is favorable ( $m_3\mu_{33}^{\text{ex}}/RT = \epsilon_{\pm(\text{KGlu})} = -0.05$ ). This probably is also the order of their interaction with cytoplasmic metabolites, most of which are carboxylate or phosphate salts. These results may provide insight into the types of biopolymer surface that are water accessible in biopolymer assemblies in the cytoplasm. Biopolymer assembly is often driven by the hydrophobic effect, burying hydrocarbon groups. The water-accessible surface of these assemblies in vivo appears to be enriched in anionic (protein carboxylate, nucleic acid phosphate) and amide oxygens, with limited exposure of amide and cationic nitrogen groups.

Unfavorable self-interactions and unfavorable interactions with other solutes and biopolymers increase the effectiveness of a cytoplasmic solute in retaining cytoplasmic water and resisting dehydration in vivo. *E. coli* accumulates similar mole

amounts of the different osmolytes in response to a given osmotic stress (2); the greater effectiveness of GB as compared to proline or the ions of KGlu allows the cytoplasm to retain more water at high osmolality using GB rather than proline or KGlu (2). The more dilute cytoplasm at high osmolality with GB as the osmolyte results in a much faster growth rate, for reasons that are only incompletely understood (5).

Although KGlu has not generally been considered as an osmoprotectant, the results of this study show that it is very analogous to osmoprotectants GB and proline in its net-unfavorable interactions with protein functional groups. Hence KGlu should be considered an osmoprotectant, though less effective in vivo than GB and proline because their self-interactions are unfavorable and their interactions with the functional groups of native proteins are on balance more unfavorable than those (per-ion) of KGlu.

Interactions of the *E. coli* osmolyte and protein stabilizer trehalose with protein functional groups have been studied at 0°C by freezing point depression osmometry (30). The pattern of interactions is very different from the other osmolytes at 23°C presented in Fig. 4. Interactions of trehalose with amide and anionic (carboxylate) O are favorable at 0°C, while interactions with  $\text{sp}^2$  and especially  $\text{sp}^3$  C are sufficiently unfavorable to make trehalose a protein stabilizer. It will be important to investigate interactions of trehalose with protein groups at 20–25°C to compare with the other osmolytes in Fig. 4.

To be an effective intracellular osmolyte, providing the maximum osmolality at a given concentration of the osmolyte, a solute must interact unfavorably with the native biopolymers (protein, nucleic acid, membrane) and small solutes of the cell. The ASA of these biopolymers and solutes is largely aliphatic hydrocarbon and anionic (carboxylate, phosphate) and amide oxygen, so it is not a surprise that all *E. coli* osmolytes investigated to date have unfavorable interactions with these hydrocarbon and oxygen groups. Urea would not be nearly as effective an osmolyte because it interacts favorably with these groups. To be an effective protein stabilizer, a solute must interact unfavorably with the protein ASA that is exposed in unfolding. This  $\Delta\text{ASA}$  of unfolding is primarily aliphatic hydrocarbon and amide oxygen, with smaller amounts of aromatic hydrocarbon, amide nitrogen, and charged or other polar groups. Unfavorable interactions of *E. coli* osmolytes with amide oxygen and aliphatic hydrocarbon groups make these osmolytes effective protein stabilizers, while favorable interactions of urea with these groups make urea a protein destabilizer.

## SUPPORTING MATERIAL

Two figures and four tables are available at [http://www.biophysj.org/biophysj/supplemental/S0006-3495\(16\)30823-2](http://www.biophysj.org/biophysj/supplemental/S0006-3495(16)30823-2).

## AUTHOR CONTRIBUTIONS

X.C., E.J.G., and M.T.R. designed the research; E.B., R.W., X.C., and E.J.G. performed the experiments; X.C., R.S., I.A.S., and M.T.R. analyzed the data; and X.C. and M.T.R. wrote the article.

## ACKNOWLEDGMENTS

We thank Yingxi Mao for writing custom MATLAB code for evaluating propagated uncertainty for Tables 1 and 2.

Support from National Institutes of Health grant No. GM047022 (to M.T.R.) and the University of Wisconsin-Madison is gratefully acknowledged.

## REFERENCES

- Richey, B., D. S. Cayley, ..., M. T. Record, Jr. 1987. Variability of the intracellular ionic environment of *Escherichia coli*. Differences between in vitro and in vivo effects of ion concentrations on protein-DNA interactions and gene expression. *J. Biol. Chem.* 262:7157–7164.
- Cayley, S., B. A. Lewis, and M. T. Record, Jr. 1992. Origins of the osmoprotective properties of betaine and proline in *Escherichia coli* K-12. *J. Bacteriol.* 174:1586–1595.
- Cayley, S., M. T. Record, Jr., and B. A. Lewis. 1989. Accumulation of 3-(N-morpholino)propanesulfonate by osmotically stressed *Escherichia coli* K-12. *J. Bacteriol.* 171:3597–3602.
- Dinnbier, U., E. Limpinsel, ..., E. P. Bakker. 1988. Transient accumulation of potassium glutamate and its replacement by trehalose during adaptation of growing cells of *Escherichia coli* K-12 to elevated sodium chloride concentrations. *Arch. Microbiol.* 150:348–357.
- Cayley, S., and M. T. Record, Jr. 2003. Roles of cytoplasmic osmolytes, water, and crowding in the response of *Escherichia coli* to osmotic stress: biophysical basis of osmoprotection by glycine betaine. *Biochemistry*. 42:12596–12609.
- Cayley, S., B. A. Lewis, ..., M. T. Record, Jr. 1991. Characterization of the cytoplasm of *Escherichia coli* K-12 as a function of external osmolarity. Implications for protein-DNA interactions in vivo. *J. Mol. Biol.* 222:281–300.
- Record, M. T., Jr., E. S. Courtenay, ..., H. J. Guttman. 1998. Responses of *E. coli* to osmotic stress: large changes in amounts of cytoplasmic solutes and water. *Trends Biochem. Sci.* 23:143–148.
- Record, M. T., Jr., E. S. Courtenay, ..., H. J. Guttman. 1998. Biophysical compensation mechanisms buffering *E. coli* protein-nucleic acid interactions against changing environments. *Trends Biochem. Sci.* 23:190–194.
- Epstein, W., and S. G. Schultz. 1965. Cation transport in *Escherichia coli*: V. Regulation of cation content. *J. Gen. Physiol.* 49:221–234.
- Nakajima, H., I. Yamato, and Y. Anraku. 1979. Quantitative analysis of potassium ion pool in *Escherichia coli* K-12. *J. Biochem.* 85:303–310.
- Kuhn, A., and E. Kellenberger. 1985. Productive phage infection in *Escherichia coli* with reduced internal levels of the major cations. *J. Bacteriol.* 163:906–912.
- Measures, J. C. 1975. Role of amino acids in osmoregulation of non-halophilic bacteria. *Nature*. 257:398–400.
- Larsen, P. I., L. K. Sydnes, ..., A. R. Strøm. 1987. Osmoregulation in *Escherichia coli* by accumulation of organic osmolytes: betaines, glutamic acid, and trehalose. *Arch. Microbiol.* 147:1–7.
- Tempest, D. W., J. L. Meers, and C. M. Brown. 1970. Influence of environment on the content and composition of microbial free amino acid pools. *J. Gen. Microbiol.* 64:171–185.
- Munro, G. F., K. Hercules, ..., W. Sauerbier. 1972. Dependence of the putrescine content of *Escherichia coli* on the osmotic strength of the medium. *J. Biol. Chem.* 247:1272–1280.
- Csonka, L. N. 1989. Physiological and genetic responses of bacteria to osmotic stress. *Microbiol. Rev.* 53:121–147.
- Wood, J. M. 1999. Osmosensing by bacteria: signals and membrane-based sensors. *Microbiol. Mol. Biol. Rev.* 63:230–262.
- Wood, J. M., E. Bremer, ..., L. T. Smith. 2001. Osmosensing and osmoregulatory compatible solute accumulation by bacteria. *Comp. Biochem. Physiol. A Mol. Integr. Physiol.* 130:437–460.
- Arakawa, T., and S. N. Timasheff. 1984. The mechanism of action of Na glutamate, lysine HCl, and piperazine-N,N'-bis(2-ethanesulfonic acid) in the stabilization of tubulin and microtubule formation. *J. Biol. Chem.* 259:4979–4986.
- Sengupta, R., A. Pantel, ..., M. T. Record, Jr. 2016. Positioning the intracellular salt potassium glutamate in the Hofmeister series by chemical unfolding studies of NTL9. *Biochemistry*. 55:2251–2259.
- Leirimo, S., C. Harrison, ..., M. T. Record, Jr. 1987. Replacement of potassium chloride by potassium glutamate dramatically enhances protein-DNA interactions in vitro. *Biochemistry*. 26:2095–2101.
- Lohman, T. M., K. Chao, ..., G. T. Runyon. 1989. Large-scale purification and characterization of the *Escherichia coli* rep gene product. *J. Biol. Chem.* 264:10139–10147.
- Deredge, D. J., J. T. Baker, ..., V. J. Licata. 2010. The glutamate effect on DNA binding by pol I DNA polymerases: osmotic stress and the effective reversal of salt linkage. *J. Mol. Biol.* 401:223–238.
- Ha, J. H., M. W. Capp, ..., M. T. Record, Jr. 1992. Thermodynamic stoichiometries of participation of water, cations and anions in specific and non-specific binding of lac repressor to DNA. Possible thermodynamic origins of the “glutamate effect” on protein-DNA interactions. *J. Mol. Biol.* 228:252–264.
- Menetski, J. P., A. Varghese, and S. C. Kowalczykowski. 1992. The physical and enzymatic properties of *Escherichia coli* recA protein display anion-specific inhibition. *J. Biol. Chem.* 267:10400–10404.
- Kontur, W. S., M. W. Capp, ..., M. T. Record, Jr. 2010. Probing DNA binding, DNA opening, and assembly of a downstream clamp/jaw in *Escherichia coli* RNA polymerase-lambdaP(R) promoter complexes using salt and the physiological anion glutamate. *Biochemistry*. 49:4361–4373.
- Overman, L. B., W. Bujalowski, and T. M. Lohman. 1988. Equilibrium binding of *Escherichia coli* single-strand binding protein to single-stranded nucleic acids in the (SSB)65 binding mode. Cation and anion effects and polynucleotide specificity. *Biochemistry*. 27:456–471.
- Capp, M. W., L. M. Pegram, ..., M. T. Record, Jr. 2009. Interactions of the osmolyte glycine betaine with molecular surfaces in water: thermodynamics, structural interpretation, and prediction of *m*-values. *Biochemistry*. 48:10372–10379.
- Diehl, R. C., E. J. Guinn, ..., M. T. Record, Jr. 2013. Quantifying additive interactions of the osmolyte proline with individual functional groups of proteins: comparisons with urea and glycine betaine, interpretation of *m*-values. *Biochemistry*. 52:5997–6010.
- Hong, J., L. M. Gierasch, and Z. Liu. 2015. Its preferential interactions with biopolymers account for diverse observed effects of trehalose. *Biophys. J.* 109:144–153.
- Record, M. T., Jr., E. Guinn, ..., M. Capp. 2013. Introductory lecture: interpreting and predicting Hofmeister salt ion and solute effects on biopolymer and model processes using the solute partitioning model. *Faraday Discuss.* 160:9–44, discussion 103–120.
- Auton, M., J. Rösgen, ..., D. W. Bolen. 2011. Osmolyte effects on protein stability and solubility: a balancing act between backbone and side-chains. *Biophys. Chem.* 159:90–99.
- Nandi, P. K., and D. R. Robinson. 1972. The effects of salts on the free energies of nonpolar groups in model peptides. *J. Am. Chem. Soc.* 94:1308–1315.
- Nandi, P. K., and D. R. Robinson. 1972. The effects of salts on the free energy of the peptide group. *J. Am. Chem. Soc.* 94:1299–1308.
- von Hippel, P. H., and A. Hamabata. 1973. Model studies on the effects of neutral salts on the conformational stability of biological macromolecules. *J. Mechanochem. Cell Motil.* 2:127–138.

36. Hamabata, A., and P. von Hippel. 1973. Model studies on effects of neutral salts on conformational stability of biological macromolecules. 2. Effects of vicinal hydrophobic groups on specificity of binding of ions to amide groups. *Biochemistry*. 12:1264–1271.
37. Pegram, L. M., and M. T. Record, Jr. 2008. Thermodynamic origin of Hofmeister ion effects. *J. Phys. Chem. B*. 112:9428–9436.
38. Pegram, L. M., T. Wendorff, ..., M. T. Record, Jr. 2010. Why Hofmeister effects of many salts favor protein folding but not DNA helix formation. *Proc. Natl. Acad. Sci. USA*. 107:7716–7721.
39. Guinn, E. J., L. M. Pegram, ..., M. T. Record, Jr. 2011. Quantifying why urea is a protein denaturant, whereas glycine betaine is a protein stabilizer. *Proc. Natl. Acad. Sci. USA*. 108:16932–16937.
40. Knowles, D. B., I. A. Shkel, ..., M. T. Record. 2015. Chemical interactions of polyethylene glycols (PEGs) and glycerol with protein functional groups: applications to effects of PEG and glycerol on protein processes. *Biochemistry*. 54:3528–3542.
41. Tsodikov, O. V., M. T. Record, Jr., and Y. V. Sergeev. 2002. Novel computer program for fast exact calculation of accessible and molecular surface areas and average surface curvature. *J. Comput. Chem*. 23:600–609.
42. Livingstone, J. R., R. S. Spolar, and M. T. Record, Jr. 1991. Contribution to the thermodynamics of protein folding from the reduction in water-accessible nonpolar surface area. *Biochemistry*. 30:4237–4244.
43. Ulrich, E. L., H. Akutsu, ..., J. L. Markley. 2008. BioMagResBank. *Nucleic Acids Res*. 36:D402–D408.
44. Berman, H. M., J. Westbrook, ..., P. E. Bourne. 2000. The Protein Data Bank. *Nucleic Acids Res*. 28:235–242.
45. Guinn, E. J., J. J. Schweinfus, ..., M. T. Record, Jr. 2013. Quantifying functional group interactions that determine urea effects on nucleic acid helix formation. *J. Am. Chem. Soc*. 135:5828–5838.
46. Courtenay, E. S., M. W. Capp, ..., M. T. Record, Jr. 2000. Thermodynamic analysis of interactions between denaturants and protein surface exposed on unfolding: interpretation of urea and guanidinium chloride *m*-values and their correlation with changes in accessible surface area (ASA) using preferential interaction coefficients and the local-bulk domain model. *Proteins*. 4 (Suppl 4):72–85.
47. Felitsky, D. J., and M. T. Record, Jr. 2004. Application of the local-bulk partitioning and competitive binding models to interpret preferential interactions of glycine betaine and urea with protein surface. *Biochemistry*. 43:9276–9288.
48. Pegram, L. M., and M. T. Record, Jr. 2006. Partitioning of atmospherically relevant ions between bulk water and the water/vapor interface. *Proc. Natl. Acad. Sci. USA*. 103:14278–14281.
49. Pegram, L. M., and M. T. Record, Jr. 2007. Hofmeister salt effects on surface tension arise from partitioning of anions and cations between bulk water and the air-water interface. *J. Phys. Chem. B*. 111:5411–5417.
50. Courtenay, E. S., M. W. Capp, ..., M. T. Record, Jr. 2000. Vapor pressure osmometry studies of osmolyte-protein interactions: implications for the action of osmoprotectants in vivo and for the interpretation of “osmotic stress” experiments in vitro. *Biochemistry*. 39:4455–4471.
51. Shkel, I. A., D. B. Knowles, and M. T. Record, Jr. 2015. Separating chemical and excluded volume interactions of polyethylene glycols with native proteins: comparison with PEG effects on DNA helix formation. *Biopolymers*. 103:517–527.
52. Berg, O. G. 1990. The influence of macromolecular crowding on thermodynamic activity: solubility and dimerization constants for spherical and dumbbell-shaped molecules in a hard-sphere mixture. *Biopolymers*. 30:1027–1037.
53. Guttman, H. J., C. F. Anderson, and M. T. Record, Jr. 1995. Analyses of thermodynamic data for concentrated hemoglobin solutions using scaled particle theory: implications for a simple two-state model of water in thermodynamic analyses of crowding in vitro and in vivo. *Biophys. J*. 68:835–846.
54. Sharp, K. A. 2015. Analysis of the size dependence of macromolecular crowding shows that smaller is better. *Proc. Natl. Acad. Sci. USA*. 112:7990–7995.
55. Guinn, E. J., W. S. Kontur, ..., M. T. Record, Jr. 2013. Probing the protein-folding mechanism using denaturant and temperature effects on rate constants. *Proc. Natl. Acad. Sci. USA*. 110:16784–16789.
56. Arakawa, T., and S. N. Timasheff. 1985. The stabilization of proteins by osmolytes. *Biophys. J*. 47:411–414.
57. Lambert, D., and D. E. Draper. 2007. Effects of osmolytes on RNA secondary and tertiary structure stabilities and RNA-Mg<sup>2+</sup> interactions. *J. Mol. Biol*. 370:993–1005.
58. Rees, W. A., T. D. Yager, ..., P. H. von Hippel. 1993. Betaine can eliminate the base pair composition dependence of DNA melting. *Biochemistry*. 32:137–144.
59. Nogales, E., S. G. Wolf, and K. H. Downing. 1998. Structure of the  $\alpha\beta$ -tubulin dimer by electron crystallography. *Nature*. 391:199–203.
60. Bujacz, A. 2012. Structures of bovine, equine and leporine serum albumin. *Acta Crystallogr. D Biol. Crystallogr*. 68:1278–1289.
61. Crowther, J. M., M. Lassé, ..., R. C. Dobson. 2014. Ultra-high resolution crystal structure of recombinant caprine  $\beta$ -lactoglobulin. *FEBS Lett*. 588:3816–3822.
62. Diamond, R. 1974. Real-space refinement of the structure of hen egg-white lysozyme. *J. Mol. Biol*. 82:371–391.

**Biophysical Journal, Volume 111**

**Supplemental Information**

**Basis of Protein Stabilization by K Glutamate: Unfavorable Interactions  
with Carbon, Oxygen Groups**

**Xian Cheng, Emily J. Guinn, Evan Buechel, Rachel Wong, Rituparna Sengupta, Irina A. Shkel, and M. Thomas Record, Jr.**

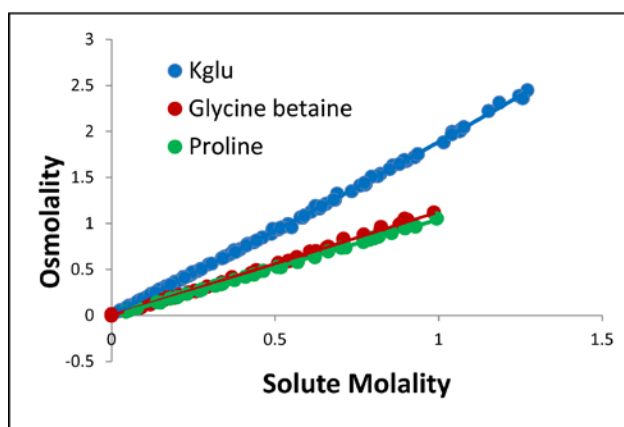

**Figure S1.** Osmolality (Osm) of two-component solutions of KGlu, glycine betaine and proline as a function of molality  $m_2$  at 23°C. For the 1:1 electrolyte KGlu in the concentration range 0.05 – 1.3 m, the initial slope of the best fit quadratic equation is  $d\text{Osm}/dm_2 = 2(1 + \epsilon_{\pm}) = 1.77 \pm 0.01$  and the intercept is 0.01. For nonelectrolytes glycine betaine and proline in the concentration range 0 – 1 m, slopes of the best fit lines with intercepts fixed at zero are  $d\text{Osm}/dm_2 = (1 + \epsilon_3) = 1.14 \pm 0.002$  (glycine betaine) and  $1.04 \pm 0.003$  (proline).

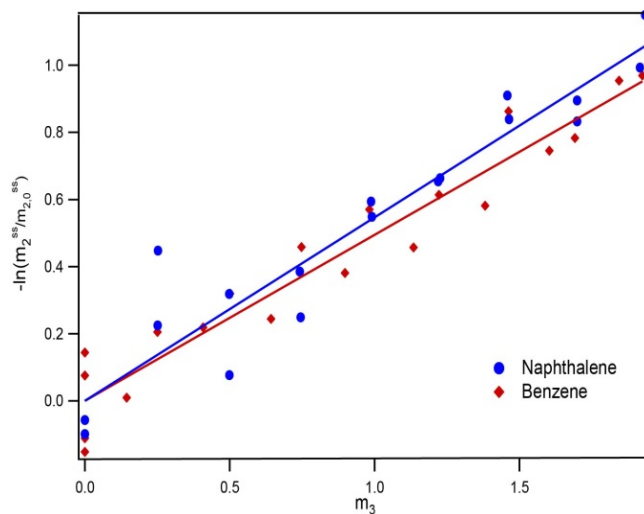

**Figure S2** Solubility determinations of preferential interactions ( $\mu_{23}$ ) of KGlu (component 3) with aromatic compounds benzene and naphthalene (component 2) at 25°C. The logarithm of the solubility ratio  $m_2^{SS}/m_{2,0}^{SS}$ , where  $m_2^{SS}$  is the molal solubility of the aromatic in a KGlu solution and  $m_{2,0}^{SS}$  is its extrapolated molal solubility in the absence of KGlu, is plotted versus KGlu molality  $m_3$ . Slopes are  $\mu_{23}/RT$ .

**Table S1. Functional Group Composition of Model Compound ASA<sup>a</sup>**

| Model Compounds  | Aliphatic<br>(sp <sup>3</sup> ) C | ASA contribution, Å <sup>2</sup> |         |               |         |            | Amide<br>O: N |
|------------------|-----------------------------------|----------------------------------|---------|---------------|---------|------------|---------------|
|                  |                                   | sp <sup>2</sup> C                | Amide O | Carboxylate O | Amide N | Cationic N |               |
| aama             | 258                               | 4.3 <sup>b</sup>                 | 62.5    | 0             | 21.1    | 0          | 2.96          |
| 1,3-diethylurea  | 249                               | 5.8 <sup>b</sup>                 | 28.7    | 0             | 33.8    | 0          | 0.85          |
| naphthalene      | 0                                 | 273 <sup>c</sup>                 | 0       | 0             | 0       | 0          | --            |
| glycine betaine  | 194                               | 2.7 <sup>d</sup>                 | 0       | 81            | 0       | 0          | --            |
| benzene          | 0                                 | 212 <sup>c</sup>                 | 0       | 0             | 0       | 0          | --            |
| 1,1-diethylurea  | 209                               | 3.7 <sup>b</sup>                 | 35.7    | 0             | 50      | 0          | 0.71          |
| 1,3-dimethylurea | 177                               | 5.8 <sup>b</sup>                 | 28.7    | 0             | 44.9    | 0          | 0.64          |
| propionamide     | 125                               | 4.3 <sup>b</sup>                 | 36.8    | 0             | 61.6    | 0          | 0.60          |
| proline          | 147                               | 4 <sup>d</sup>                   | 0       | 80            | 0       | 38         | --            |
| valine           | 145                               | 2.7 <sup>d</sup>                 | 0       | 80.5          | 0       | 63.4       | --            |
| methylurea       | 88.4                              | 6.5 <sup>b</sup>                 | 38.3    | 0             | 87.5    | 0          | 0.44          |
| malonamide       | 48.5                              | 8.5 <sup>b</sup>                 | 65.7    | 0             | 123     | 0          | 0.53          |
| alanine          | 87                                | 4.4 <sup>d</sup>                 | 0       | 85.7          | 0       | 69.2       | --            |
| urea             | 0                                 | 7.2 <sup>b</sup>                 | 47.9    | 0             | 130     | 0          | 0.37          |
| glycine          | 51.6                              | 6.6 <sup>d</sup>                 | 0       | 86            | 0       | 77         | --            |

<sup>a</sup>Structures of amino acids and glycine betaine are from BMRB (1); structures of amide and aromatic compound are from NIH Cactus website (2).

<sup>b</sup>amide sp<sup>2</sup> C; <sup>c</sup>aromatic ring sp<sup>2</sup> C; <sup>d</sup>carboxylate sp<sup>2</sup> C.

**Table S2. Comparison of Group Contributions to Amino Acid ASA from BMRB and Cactus Structures<sup>a</sup>**

| Model Compounds | ASA contribution, Å <sup>2</sup> |        |                                  |        |               |        |            |        |
|-----------------|----------------------------------|--------|----------------------------------|--------|---------------|--------|------------|--------|
|                 | Aliphatic (sp <sup>3</sup> ) C   |        | Carboxylate (sp <sup>2</sup> ) C |        | Carboxylate O |        | Cationic N |        |
|                 | BMRB                             | Cactus | BMRB                             | Cactus | BMRB          | Cactus | BMRB       | Cactus |
| glycine betaine | 194                              | 203    | 2.7                              | 4.2    | 81            | 72.5   | 0          | 0      |
| proline         | 147                              | 151    | 4                                | 4.2    | 80            | 84.6   | 38         | 34.9   |
| valine          | 145                              | 150    | 2.7                              | 3.2    | 80.5          | 79.2   | 63.4       | 54.8   |
| alanine         | 87                               | 89.5   | 4.4                              | 4.7    | 85.7          | 83     | 69.2       | 67.5   |
| glycine         | 51.6                             | 49     | 6.6                              | 6.6    | 86            | 87.7   | 77         | 76.5   |

<sup>a</sup>All ASA were calculated using the SurfRacer program (3) using the Richards set of van der Waals radii and a 1.4 Å probe radius for water.

**Table S3. Group Contributions to ASA of Native Proteins and ΔASA of Unfolding NTL9<sup>a</sup>**

| Protein           | Molecular Weight (kDa) | Hydrocarbon C | Amide O           | Carboxylate O     | Hydroxyl O        | Amide N           | Cationic N        | Total ASA         |      |
|-------------------|------------------------|---------------|-------------------|-------------------|-------------------|-------------------|-------------------|-------------------|------|
|                   |                        |               |                   |                   |                   |                   |                   |                   | ASA  |
|                   | BSA                    | 66.5          | 15.6              | 2.65              | 4.24              | 0.96              | 1.05              | 3.19              | 27.7 |
|                   | β-lactoglobulin        | 36.3          | 8.52              | 1.74              | 1.72              | 0.50              | 1.15              | 1.93              | 15.6 |
|                   | lysozyme               | 14.3          | 3.20              | 1.19              | 0.20              | 0.21              | 0.63              | 1.21              | 6.63 |
| ΔASA <sup>#</sup> | NTL9                   |               | 1.10 <sup>b</sup> | 0.25 <sup>b</sup> | 0.06 <sup>c</sup> | 0.02 <sup>c</sup> | 0.22 <sup>b</sup> | 0.08 <sup>c</sup> | 1.73 |

<sup>a</sup>All ASA values are in unit of 10<sup>3</sup> Å<sup>2</sup>.

<sup>b</sup>From Supplemental ref (4)

<sup>c</sup>Estimated for the compact unfolded structure deduced for NTL9 (3), where the ΔASA of unfolding was found to be 42% of the calculated maximum ΔASA<sub>max</sub>. This was used to scale the ΔASA of charged groups (carboxylate O and cationic N) and hydroxyl O from the ΔASA<sub>max</sub> and included in the m-value prediction.



**Table S4 Experimental and Predicted  $\mu_{23}$ -values for Osmolyte- and Urea-BSA Interactions, and Experimental Solute Self-Interactions**

| Osmolyte             | Self-Interaction<br>( $m_3\mu_{33}^{\text{ex}}/RT$ ) | Experimental $\mu_{23}/m_3$ (kcal<br>$\text{mol}^{-1} \text{m}^{-1}$ ) <sup>a</sup> | Predicted $\mu_{23}/m_3$ (kcal<br>$\text{mol}^{-1} \text{m}^{-1}$ ) <sup>b</sup> |
|----------------------|------------------------------------------------------|-------------------------------------------------------------------------------------|----------------------------------------------------------------------------------|
| GB <sup>a</sup>      | 0.14 ± 0.002                                         | 21.7 ± 3.4                                                                          | 10.8 ± 3.3                                                                       |
| Proline <sup>a</sup> | 0.04 ± 0.003                                         | 11.9 ± 0.3                                                                          | 7.7 ± 2.0                                                                        |
| KGlu                 | -0.24 ± 0.01                                         | 20.7 ± 2.1                                                                          | 18 ± 2.7                                                                         |
| Urea <sup>a</sup>    | -0.02 <sup>c</sup>                                   | -4.5                                                                                | -3.6 ± 0.8                                                                       |

<sup>a</sup>Experimental values of GB, proline and urea are from the data of Diehl et al (5). KGlu data was determined at 20°C, GB, proline and urea data was determined at 24-25°C.

<sup>b</sup>Predicted values of GB, proline and urea are from the data of Diehl et al (5), predicted value for KGlu data is described in Table 3.

<sup>c</sup>Guinn et al (2)

### Supporting References

1. Ulrich, E. L., H. Akutsu, J. F. Doreleijers, Y. Harano, Y. E. Ioannidis, J. Lin, M. Livny, S. Mading, D. Maziuk, Z. Miller, E. Nakatani, C. F. Schulte, D. E. Tolmie, R. Kent Wenger, H. Yao, and J. L. Markley. 2008. BioMagResBank. *Nucleic. Acids. Res.* 36:D402-408.
2. Guinn, E. J., L. M. Pegram, M. W. Capp, M. N. Pollock, and M. T. Record, Jr. 2011. Quantifying why urea is a protein denaturant, whereas glycine betaine is a protein stabilizer. *Proc. Natl. Acad. Sci. U S A.* 108:16932-16937.
3. Tsodikov, O. V., M. T. Record, Jr., and Y. V. Sergeev. 2002. Novel computer program for fast exact calculation of accessible and molecular surface areas and average surface curvature. *J. Comput. Chem.* 23:600-609.
4. Sengupta, R., A. Pantel, X. Cheng, I. Shkel, I. Peran, N. Stenzoski, D. P. Raleigh, and M. T. Record, Jr. 2016. Positioning the Intracellular Salt Potassium Glutamate in the Hofmeister Series by Chemical Unfolding Studies of NTL9. *Biochemistry.* 55:2251-2259.
5. Diehl, R. C., E. J. Guinn, M. W. Capp, O. V. Tsodikov, and M. T. Record, Jr. 2013. Quantifying additive interactions of the osmolyte proline with individual functional groups of proteins: comparisons with urea and glycine betaine, interpretation of m-values. *Biochemistry.* 52:5997-6010.
